# Supplementary material
Source: PubMed Central journal article supplement (PMC7294085)
Supplement: supp_RA119.012351_157765_2_supp_517774_q9ddt8.pdf [file supp_RA119.012351_157765_2_supp_517774_q9ddt8.pdf]

## Supporting Information for:

### **The structure of the extracellular domains of the human interleukin 11 $\alpha$ -receptor elucidates mechanisms of cytokine engagement**

Riley D. Metcalfe<sup>1</sup>, Kaheina Aizel<sup>1,2</sup>, Courtney O. Zlatic<sup>1</sup>, Paul M. Nguyen<sup>2,3</sup>, Craig J. Morton<sup>1</sup>, Daisy Sio-Seng Lio<sup>1,4</sup>, Heung-Chin Cheng<sup>1</sup>, Renwick C.J. Dobson<sup>1,5</sup>, Michael W. Parker<sup>1,6</sup>, Paul R. Gooley<sup>1</sup>, Tracy L. Putoczki<sup>2,3,7</sup>, Michael D.W. Griffin<sup>1</sup>.

<sup>1</sup> Department of Biochemistry and Molecular Biology, Bio21 Molecular Science and Biotechnology Institute, University of Melbourne, Parkville, Victoria, Australia,

<sup>2</sup> Inflammation Division, The Walter and Eliza Hall Institute of Medical Research, Parkville, Victoria, Australia

<sup>3</sup> Personalised Oncology Division, The Walter and Eliza Hall Institute of Medical Research, Parkville, Victoria, Australia

<sup>4</sup> Structural Biology Division, The Walter and Eliza Hall Institute of Medical Research, Parkville, Victoria, Australia

<sup>5</sup> Biomolecular Interaction Centre and School of Biological Sciences, University of Canterbury, Christchurch, New Zealand

<sup>6</sup> ACRF Rational Drug Discovery Centre, St. Vincent's Institute of Medical Research, Fitzroy, Victoria, Australia

<sup>7</sup> Department of Medical Biology and Department of Surgery, University of Melbourne, Parkville, Victoria, Australia

This Supporting Information comprises:

Table S1

Figures S1-S10

Movies S1-S4

**Table S1.** SAXS data collection and analysis.

|                                                       | IL-11 $\Delta$ 10                                                                                              | IL-11 <sub>FL</sub> | IL-11R $\alpha$ <sub>D1-D3</sub> | IL-11R $\alpha$ <sub>D1-D3</sub> /<br>IL-11 $\Delta$ 10 complex |
|-------------------------------------------------------|----------------------------------------------------------------------------------------------------------------|---------------------|----------------------------------|-----------------------------------------------------------------|
| <b>SAXS data collection</b>                           |                                                                                                                |                     |                                  |                                                                 |
| Instrument/source                                     | Australian Synchrotron SAXS/WAXS beamline equipped with Pilatus 2M detector and sheath-flow cell for SEC-SAXS. |                     |                                  |                                                                 |
| Wavelength (Å)                                        | 1.078                                                                                                          |                     |                                  |                                                                 |
| Beam energy (keV)                                     | 11.5                                                                                                           |                     |                                  |                                                                 |
| Beam size (μm)                                        | 250 × 130                                                                                                      |                     |                                  |                                                                 |
| Sample-to-detector distance (mm)                      | 2038                                                                                                           |                     | 2539                             |                                                                 |
| $q$ measurement range (Å <sup>-1</sup> ) <sup>a</sup> | 0.007-0.664                                                                                                    |                     | 0.006-0.534                      |                                                                 |
| Absolute scaling method                               | Comparison with scattering from 1 mm pure water                                                                |                     |                                  |                                                                 |
| Normalization                                         | To transmitted intensity from beamstop counter                                                                 |                     |                                  |                                                                 |
| Exposure time                                         | 1 s measurements from SEC-SAXS elution                                                                         |                     |                                  |                                                                 |
| Sample temperature (K)                                | 293                                                                                                            |                     |                                  |                                                                 |
| <b>SEC-SAXS parameters</b>                            |                                                                                                                |                     |                                  |                                                                 |
| Column                                                | Superdex 200 5/150 Increase                                                                                    |                     |                                  |                                                                 |
| Flow rate (mL/min)                                    | 0.45                                                                                                           |                     |                                  |                                                                 |
| Loading concentration (mg/mL)                         | 5                                                                                                              | 5                   | 2.2                              | 2.65                                                            |
| Injection volume (μL)                                 | 50                                                                                                             |                     |                                  |                                                                 |
| Solvent                                               | 20 mM Tris-HCl pH 8.5, 150 mM NaCl, 0.2% sodium azide                                                          |                     |                                  |                                                                 |
| <b>Software employed</b>                              |                                                                                                                |                     |                                  |                                                                 |
| SAXS data reduction                                   | $I(q)$ vs $q$ using Scatterbrain 2.8.2, SEC-SAXS solvent subtraction using CHROMIXS from ATSAS 2.8.3           |                     |                                  |                                                                 |
| Basic analysis (Guinier, $P(r)$ , molecular mass)     | PRIMUS from ATSAS 2.8.3<br>GNOM from ATSAS 2.8.3                                                               |                     |                                  |                                                                 |
| Shape modelling                                       | DAMMIF from ATSAS 2.8.3<br>DAMAVER from ATSAS 2.8.3<br>DAMMIN from ATSAS 2.8.3                                 |                     |                                  |                                                                 |

Calculation of theoretical intensities *CRY SOL* from *ATSAS 2.8.3*

### Structural parameters

|                                                                                    |                   |                  |                   |                   |
|------------------------------------------------------------------------------------|-------------------|------------------|-------------------|-------------------|
| Mass from $V_c$ (kDa) (expected mass, ratio to expected, in brackets) <sup>b</sup> | 16.3 (18.2, 0.90) | 17.2 (19.2,0.90) | 33.5 (32.2, 1.04) | 50.1 (50.4, 0.99) |
|------------------------------------------------------------------------------------|-------------------|------------------|-------------------|-------------------|

### Guinier analysis <sup>c</sup>

|                            |                          |                          |                          |                          |
|----------------------------|--------------------------|--------------------------|--------------------------|--------------------------|
| $R_g$ (Å)                  | $17.43 \pm 0.11$         | $18.89 \pm 0.11$         | $30.16 \pm 0.32$         | $33.07 \pm 0.37$         |
| $I(0)$ (cm <sup>-1</sup> ) | 0.0061                   | 0.0068                   | 0.011                    | 0.0094                   |
|                            | $\pm 2.4 \times 10^{-5}$ | $\pm 2.4 \times 10^{-5}$ | $\pm 6.7 \times 10^{-5}$ | $\pm 6.4 \times 10^{-5}$ |
| $qR_g$ min,max             | 0.18, 1.31               | 0.21,1.31                | 0.25, 1.30               | 0.27, 1.29               |

### $P(r)$ analysis <sup>c</sup>

|                                |                          |                          |                          |                          |
|--------------------------------|--------------------------|--------------------------|--------------------------|--------------------------|
| $R_g$ (Å)                      | $17.59 \pm 0.74$         | $19.00 \pm 0.90$         | $31.20 \pm 0.14$         | $33.41 \pm 0.21$         |
| $I(0)$ (cm <sup>-1</sup> )     | 0.0061                   | 0.0068                   | 0.0094                   | 0.0093                   |
|                                | $\pm 2.1 \times 10^{-3}$ | $\pm 2.3 \times 10^{-3}$ | $\pm 5.7 \times 10^{-3}$ | $\pm 5.1 \times 10^{-3}$ |
| $D_{max}$ (Å)                  | 54                       | 61                       | 95                       | 102                      |
| Porod volume (Å <sup>3</sup> ) | 21700                    | 27600                    | 41200                    | 85500                    |

### Shape modelling

|                                                     |                       |
|-----------------------------------------------------|-----------------------|
| <i>DAMMIF</i> (10 calculations, default parameters) |                       |
| $q$ range for fitting (Å)                           | 0.008-0.16            |
| Symmetry, anisotropy assumptions                    | <i>P1</i> , none      |
| NSD (standard deviations)                           | 0.797 (0.100)         |
| $\chi^2$ range                                      | 1.035-1.036           |
| Constant adjustment to intensities                  | $8.31 \times 10^{-5}$ |
| Resolution (from <i>SASRES</i> ) <sup>d</sup> (Å)   | 36                    |
| <i>DAMMIN</i> (default parameters)                  |                       |
| $q$ range for fitting (Å)                           | 0.008-0.16            |

|                                          |                       |
|------------------------------------------|-----------------------|
| Symmetry,<br>anisotropy<br>assumptions   | <i>P</i> 1, none      |
| $\chi^2$                                 | 1.035                 |
| Constant<br>adjustment to<br>intensities | $8.36 \times 10^{-5}$ |

### Atomic modelling

---

*CRY SOL* (no constant subtraction)

| Structure            | PDB ID: 6O4O | PDB ID: 6O4O | PDB ID:<br>6O4P, chain<br>A, residues<br>2-297 <sup>e</sup> | Docked model |
|----------------------|--------------|--------------|-------------------------------------------------------------|--------------|
| $\chi^2$             | 1.43         | 3.21         | 1.05                                                        | 1.03         |
| Calculated $R_g$ (Å) | 17.41        | 17.69        | 32.17                                                       | 33.97        |

SASBDB IDs for data and models:

|         |         |         |         |
|---------|---------|---------|---------|
| SASDGH2 | SASDGJ2 | SASDGG2 | SASDGK2 |
|---------|---------|---------|---------|

<sup>a</sup>  $q = (4\pi \sin\theta) / \lambda$

<sup>b</sup> (1)

<sup>c</sup> Errors from *AUTORG* or *GNOM*,  $\pm$  standard deviation

<sup>d</sup> (2)

<sup>e</sup> Corresponding to the residues present in the IL-11R $\alpha_{D1-D3}$  construct.

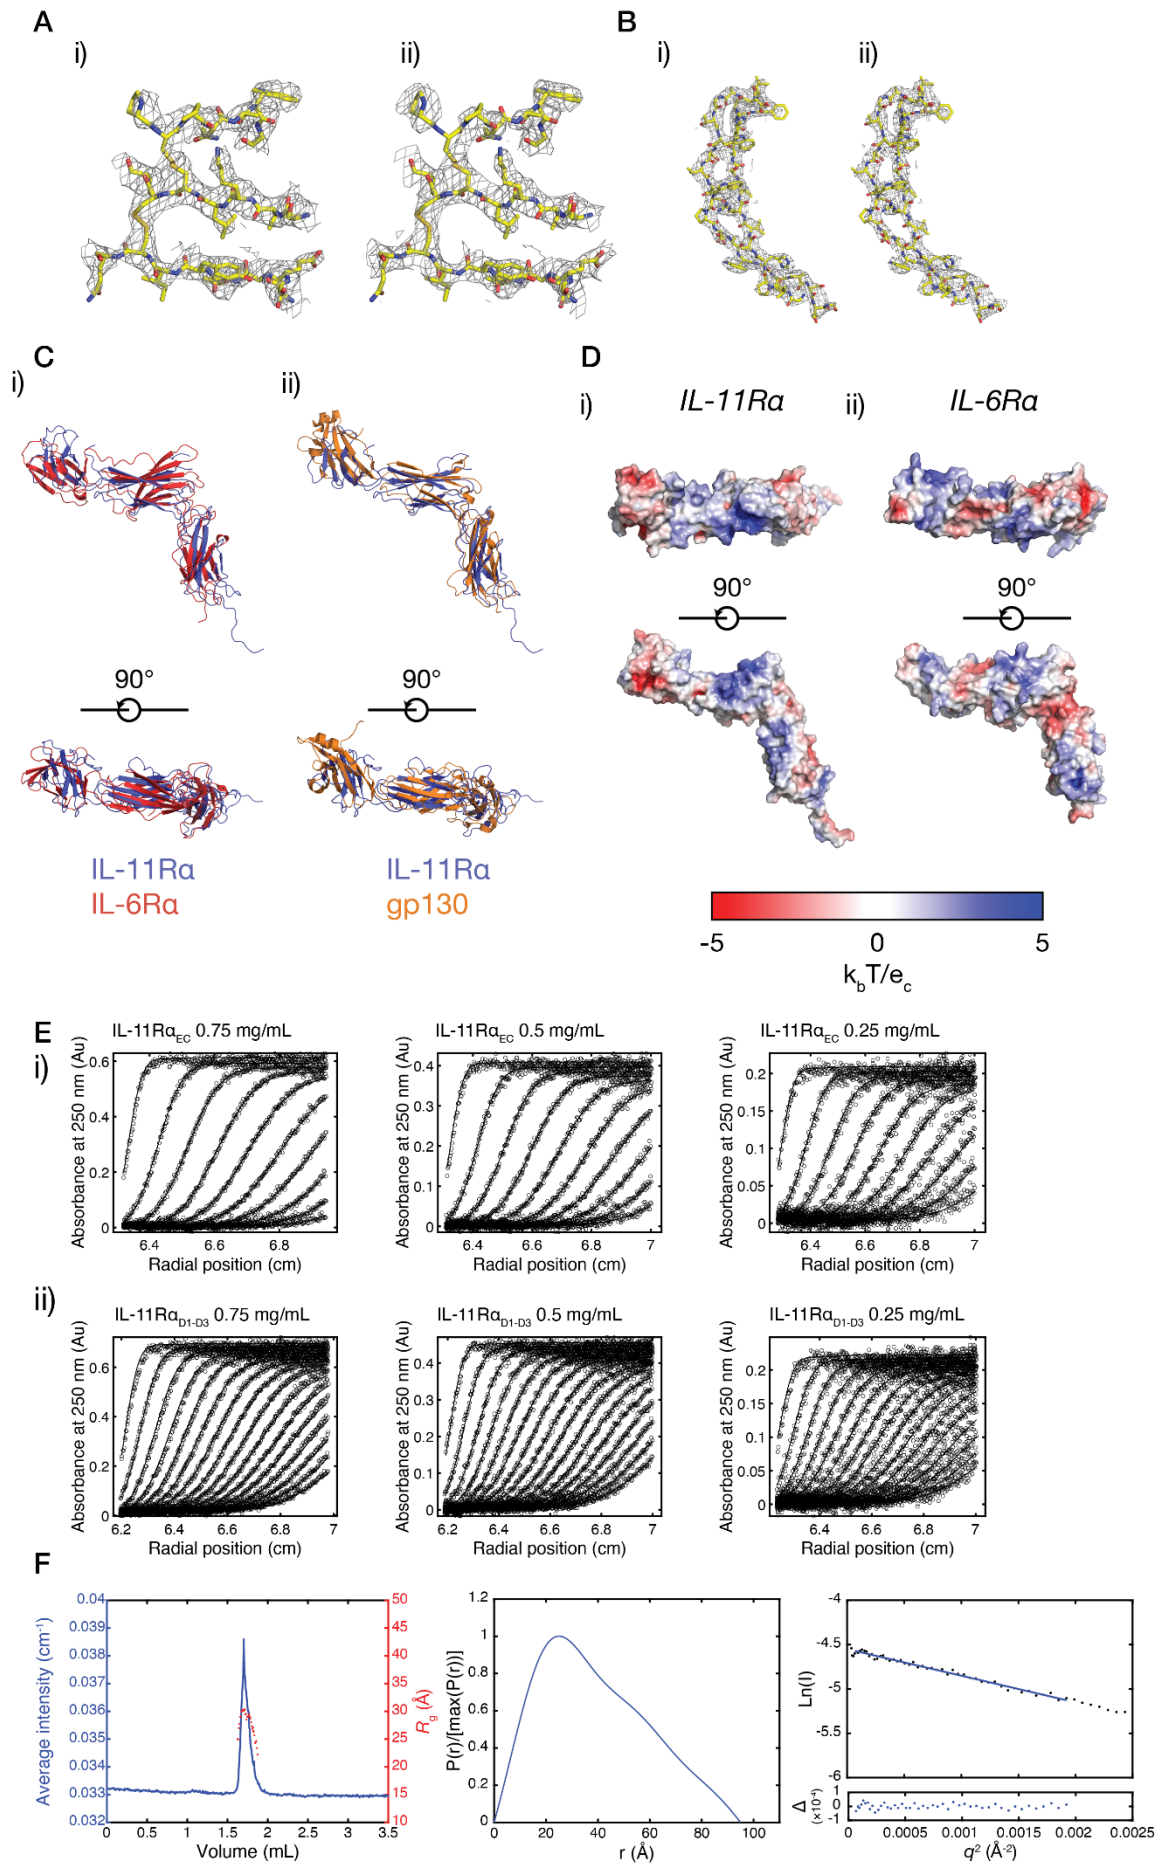

**Figure S1:** A) Electron density for the two disulfide bonds in D1 of IL-11R $\alpha$  (contorted at 1  $\sigma$ ), i) 2Fo-Fc map, ii) simulated annealing composite-omit map. B) Electron density for the WSXWS motif and surrounding residues for D3 of IL-11R $\alpha$  (contoured at 1  $\sigma$ ), i) 2Fo-Fc map, ii) simulated annealing composite-omit map. C) The cytokine-binding domains of IL-11R $\alpha$  overlaid with the cytokine-binding domains of (i) IL-6R $\alpha$  (PDB ID: 1N26) (3), and (ii) gp130 (PDB ID: 1I1R, gp130 chain) (4). D) Surface electrostatics for IL-11R $\alpha$ , i) and IL-6R $\alpha$ , ii) (PDB ID: 1N26), calculated using APBS. E) Raw AUC data (circles) overlaid with the best fit to a continuous size distribution [c(s)] model for the distributions shown in Figure 1D and 1E. F) Supporting SAXS data for IL-11R $\alpha_{D1-D3}$ , showing the SEC-SAXS chromatograms, a pairwise distance distribution (P(r)) plot and a Guinier plot, for the data shown in Figure 1E.

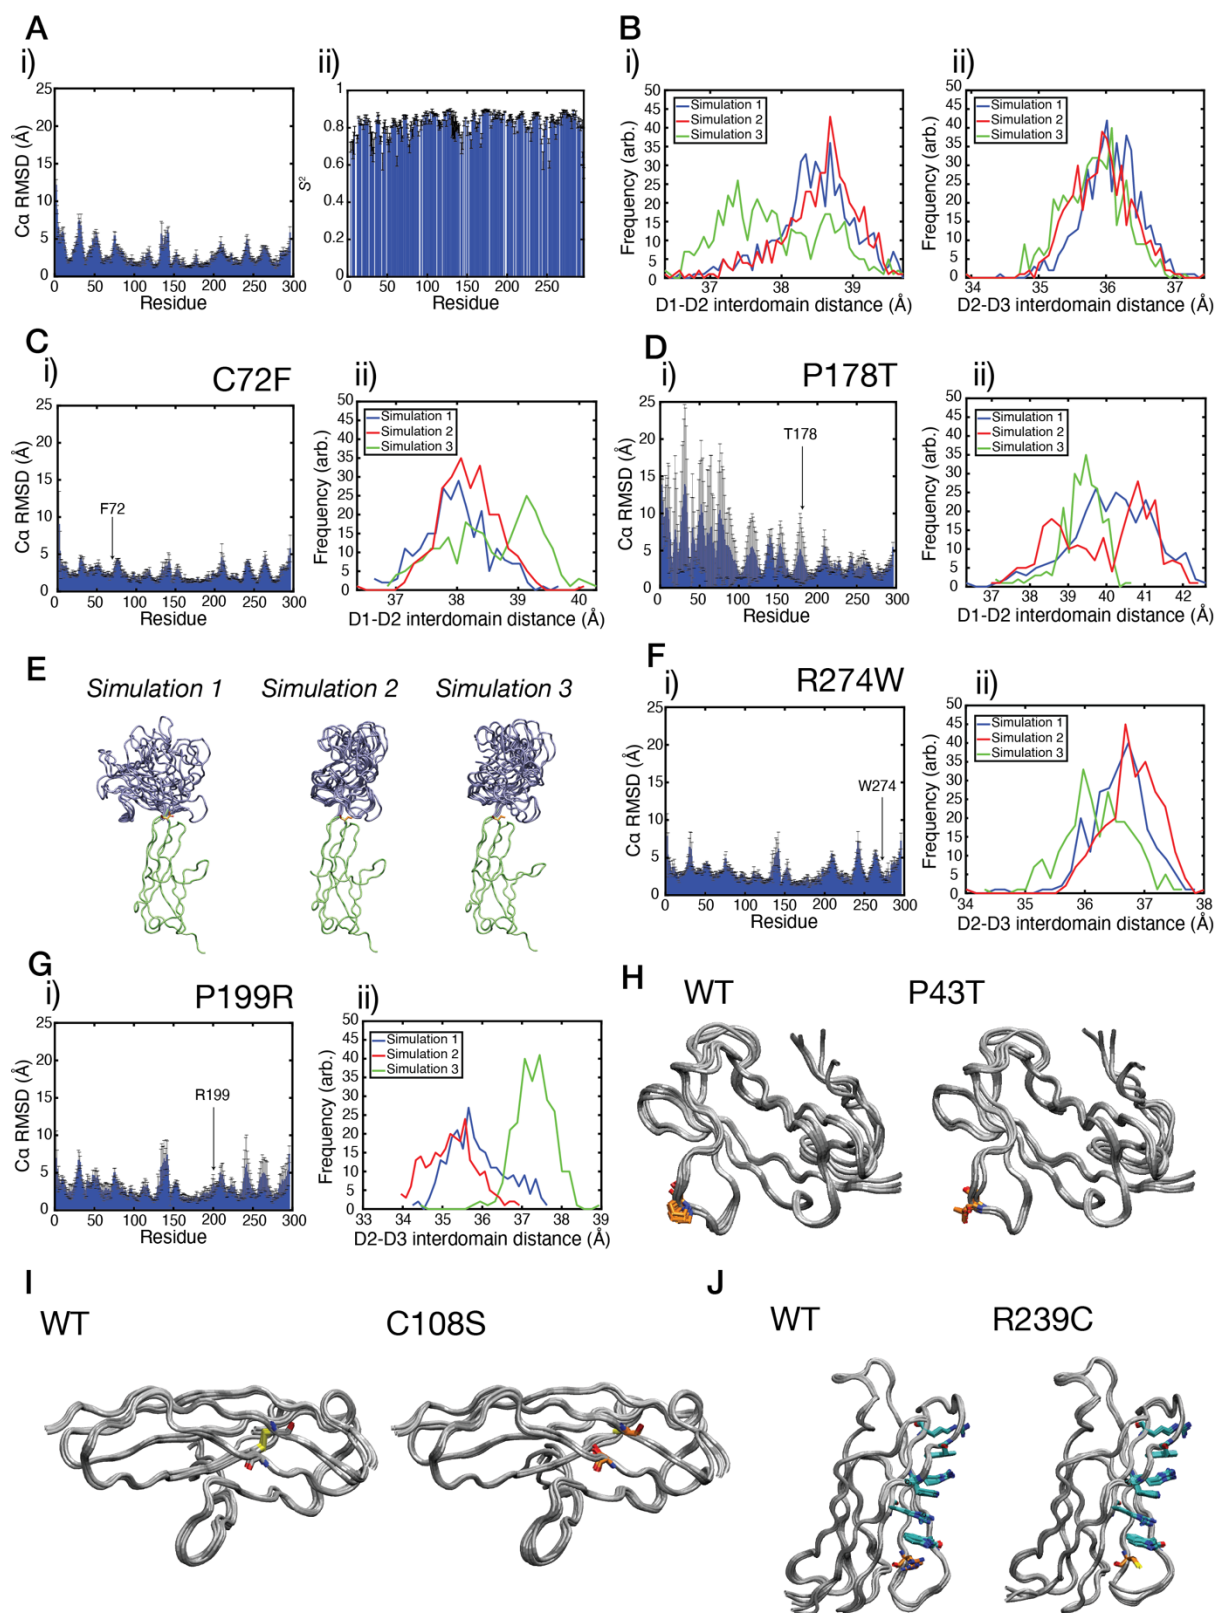

**Figure S2:** Supporting MD data. A) C $\alpha$  RMSD and order parameter values for all residues in IL-11 $\alpha$ . B) i) Interdomain distance distributions for the D1-D2 interdomain distance, and ii) Interdomain distance distributions for the D2-D3 interdomain distance through each of the 50 ns simulations. C) C $\alpha$  RMSD, i) and D1-D2 interdomain distance distribution, ii) for the C72F mutation. D) C $\alpha$  RMSD, i) and D1-D2 interdomain distance distribution, ii) for the P178T

mutation. E) Overlay of frames from each of the three MD simulations conducted for the IL-11R $\alpha$  P178T mutant. F) C $\alpha$  RMSD, i) and D2-D3 interdomain distance distribution, ii) for the R274W mutation. G) C $\alpha$  RMSD, i) and D2-D3 interdomain distance distribution, ii) for the P199R mutation. H) Overlay of frames from an MD simulation of the P43T mutation. WT IL-11R $\alpha$  is shown for direct comparison. I) Overlay of frames from an MD simulation of the C108S mutation. WT IL-11R $\alpha$  is shown for direct comparison. C98, which forms a disulphide bond with C108 in IL-11R $\alpha$  is also shown in the figure. J) Overlay of frames from an MD simulation of the R239C mutation. WT IL-11R $\alpha$  is shown for direct comparison. The other residues in the tryptophan-arginine ladder are shown in cyan. Error bars in all plots are standard deviations, calculated from three 50 ns simulations.



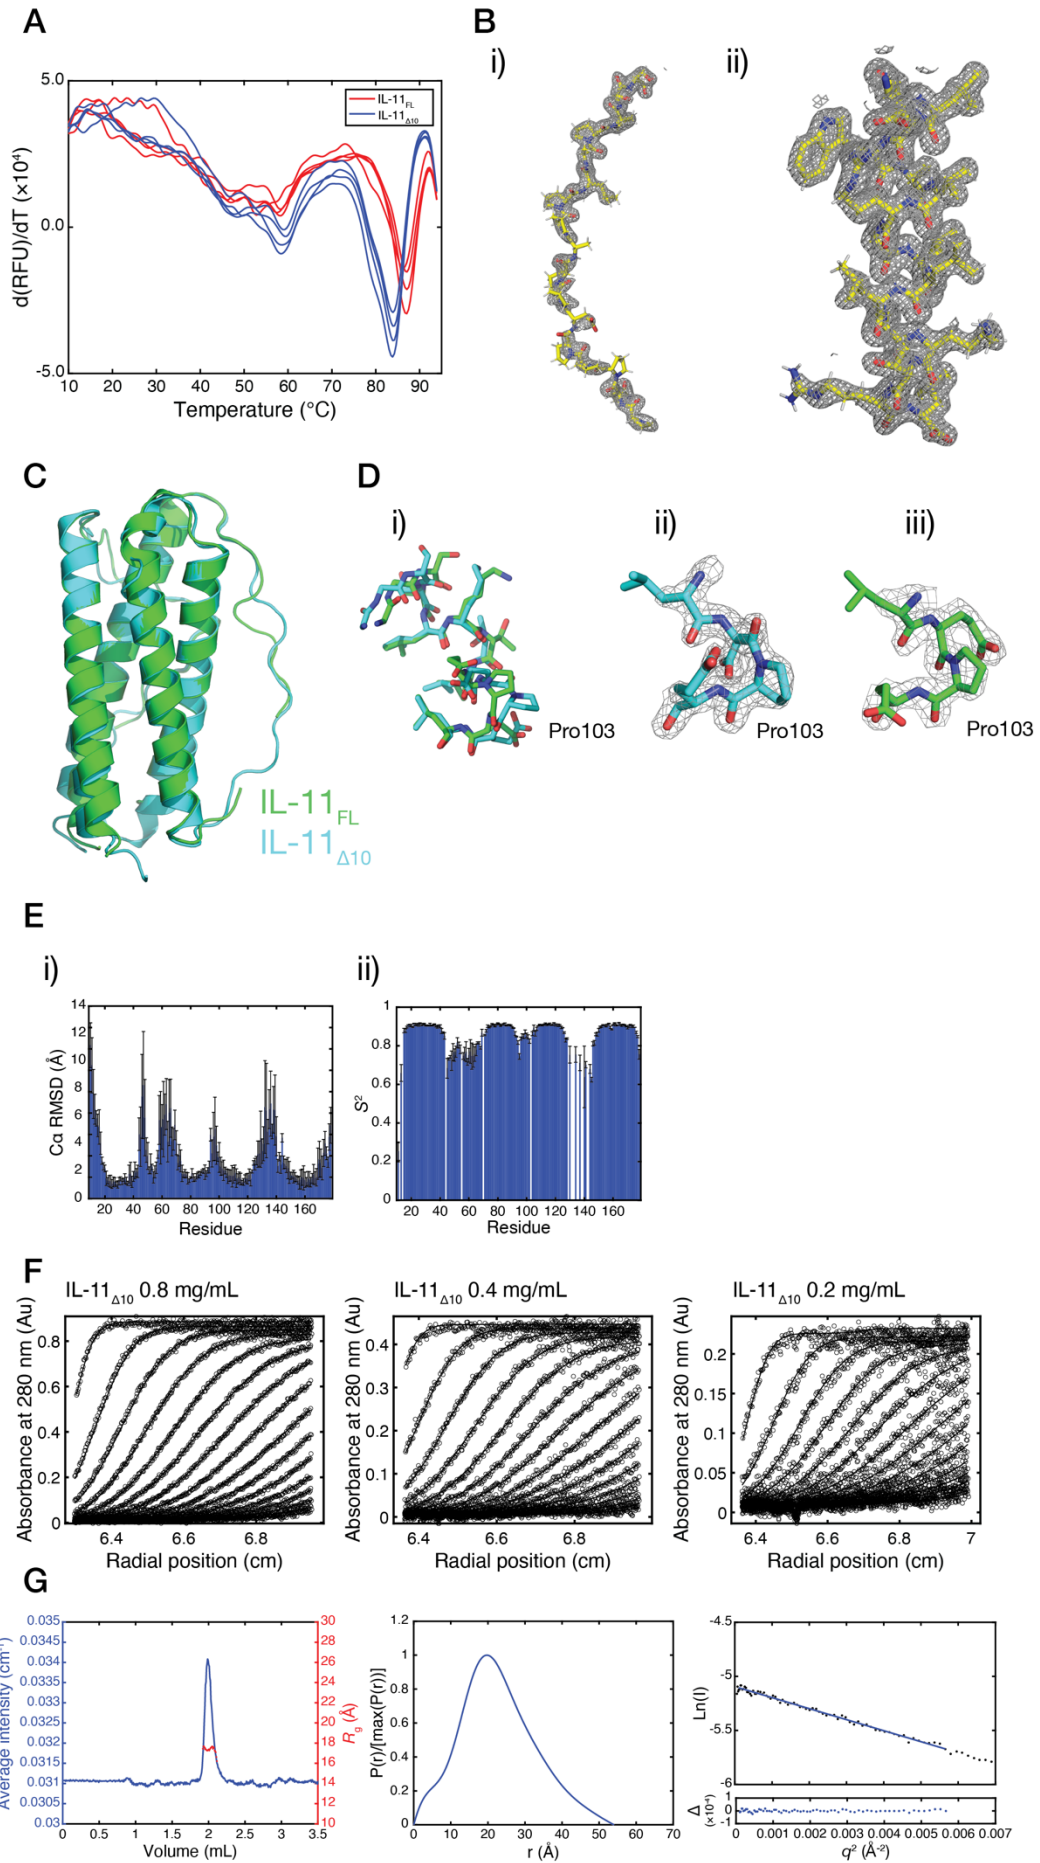

**Figure S3:** A) Differential scanning fluorimetry data, showing that IL-11<sub>FL</sub> and IL-11<sub>Δ10</sub> have very similar thermal stability, and that both are highly stable. IL-11<sub>Δ10</sub> has a temperature of hydrophobic exposure ( $T_h$ ) of 83.8 °C, and IL-11<sub>FL</sub> has a  $T_h$  of 87.0 °C. B) Representative density for the structure of IL-11<sub>Δ10</sub>. i) a portion of the polyproline helix, and ii) a C-terminal portion of helix D. Maps contoured at 1  $\sigma$ . C) Structural alignment of previous (PDB ID: 4MHL) and current IL-11 structures, showing that they have a similar structure (rmsd 0.5 Å), with a slight difference in position of the A and D helices. D) Comparison of P103 in 4MHL and the structure of IL-11<sub>Δ10</sub>. i) an overlay of the  $3_{10}$  helix in both structures, showing the *cis-trans* isomerism exhibited by Pro103, ii-iii) the density supporting the position of Pro 103 in, ii) IL-11<sub>Δ10</sub> and iii), 4MHL (maps contoured at 1.5  $\sigma$ ). E) C $\alpha$  RMSD and order parameter values for all residues in IL-11 (n=3 100 ns simulations), calculated from the MD simulation. Error bars are standard deviations. F) Raw AUC data (circles) overlaid with the best fit to a continuous size distribution [c(s)] model for the distributions shown in Figure 3G. G) SEC-SAXS chromatogram, a pairwise distance distribution (P(r)) plot, and a Guinier plot for the SAXS data shown in Figure 3H.

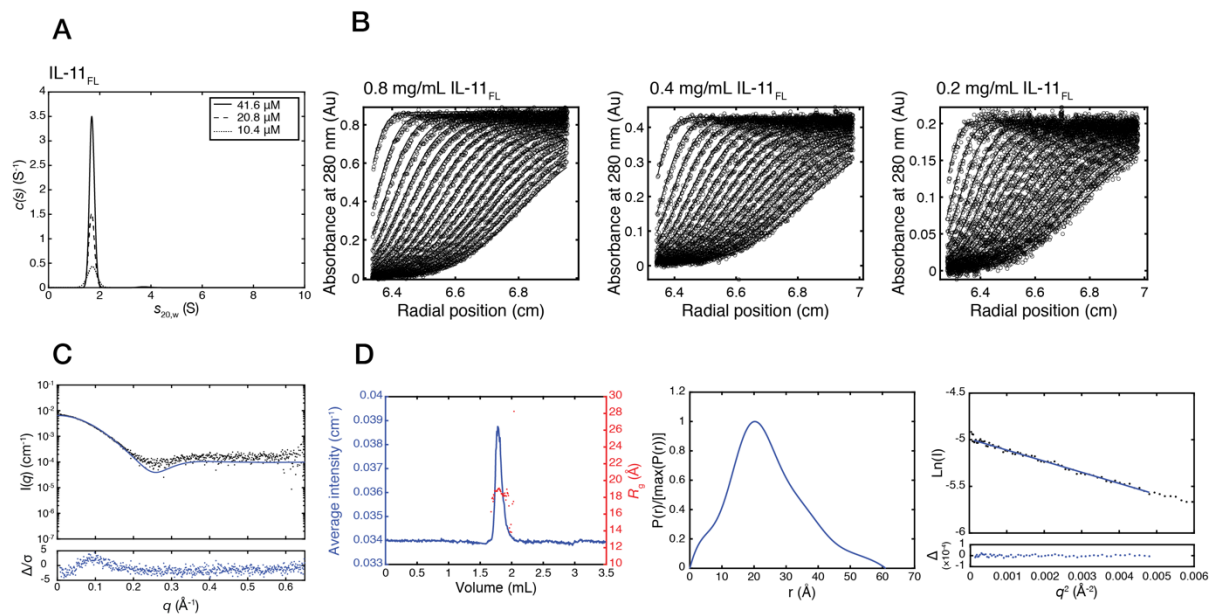

**Figure S4:** Biophysical characterisation of IL-11<sub>FL</sub>. A)  $c(s)$  distributions for IL-11<sub>FL</sub>, at three concentrations, showing that it is monomeric in solution. B) Raw AUC data (circles) overlaid with the best fit to a continuous size distribution [ $c(s)$ ] model for the distribution shown in (A). C) SAXS data for IL-11<sub>FL</sub>, with the fit to the structure of IL-11<sub>Δ10</sub> overlaid ( $\chi^2 = 3.21$ ). D) SEC-SAXS chromatogram, pairwise distance distribution ( $P(r)$ ) plot, and Guinier plot for IL-11<sub>FL</sub>.

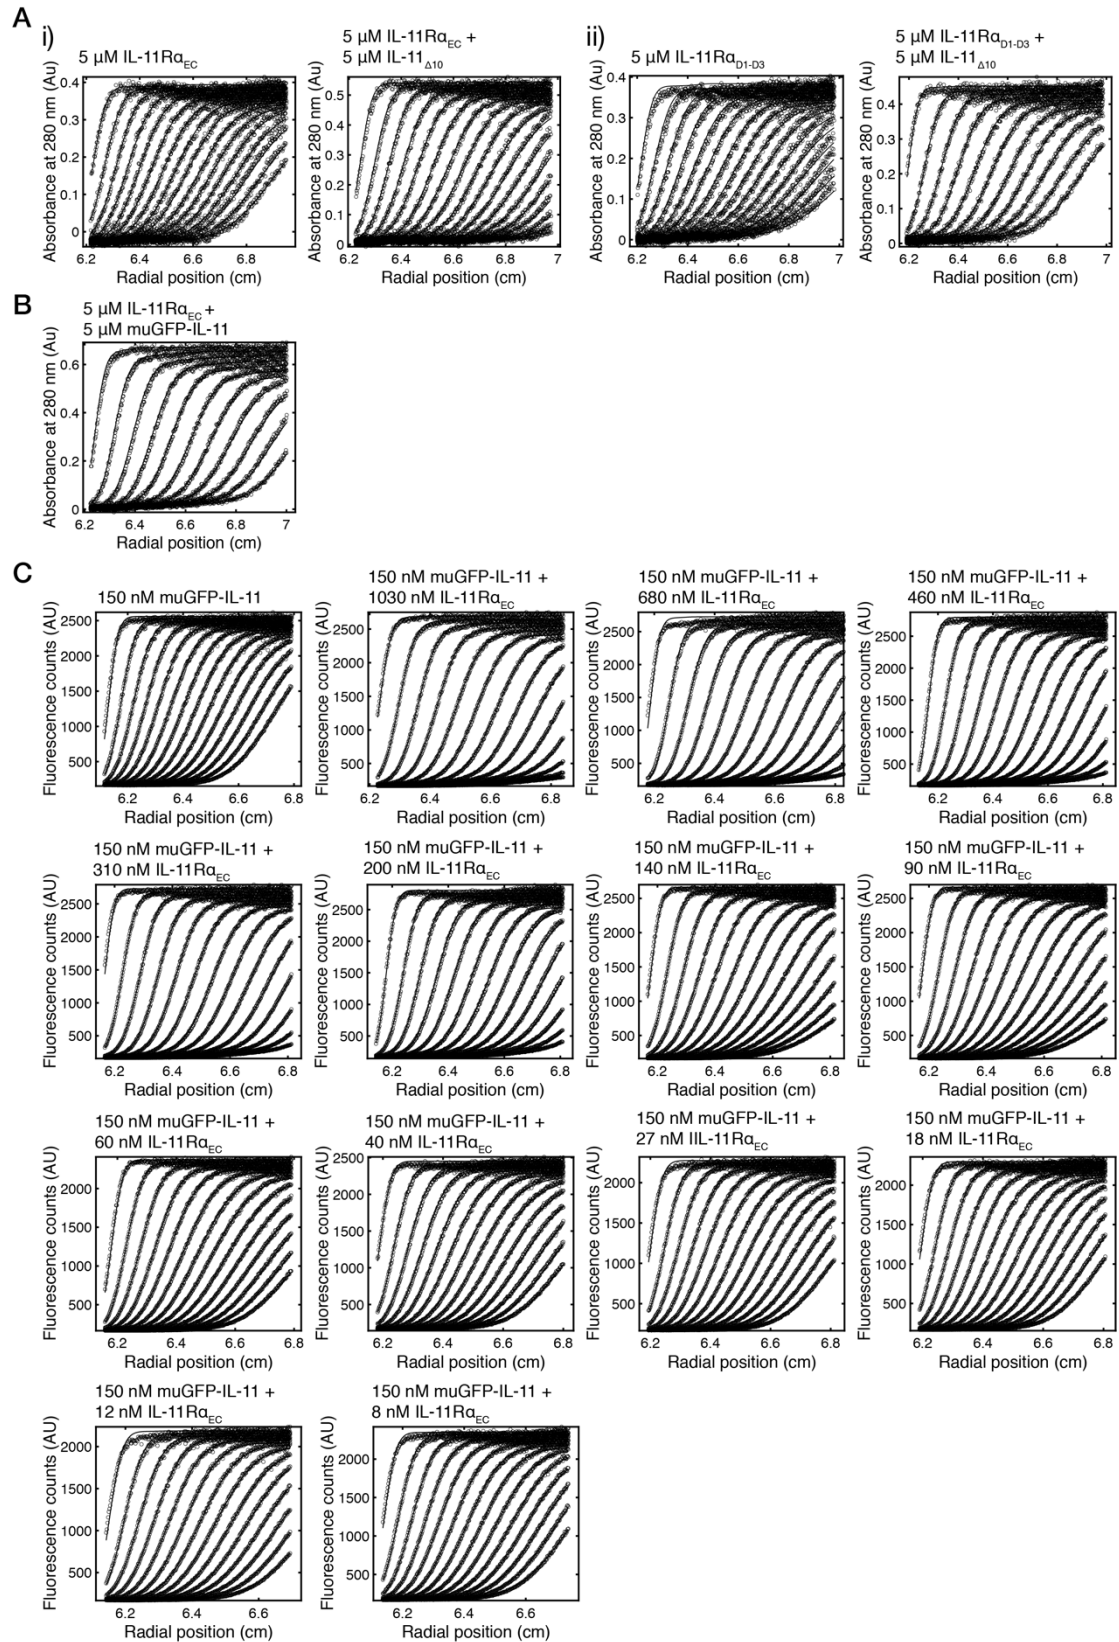

**Figure S5:** Raw AUC data (circles) overlaid with the best fit to a continuous size distribution  $[c(s)]$  model for the distributions shown in, A) i) Figure 4Ai, ii) Figure 4Aii, B) Figure 4B, C) the titration shown in Figure 4D.

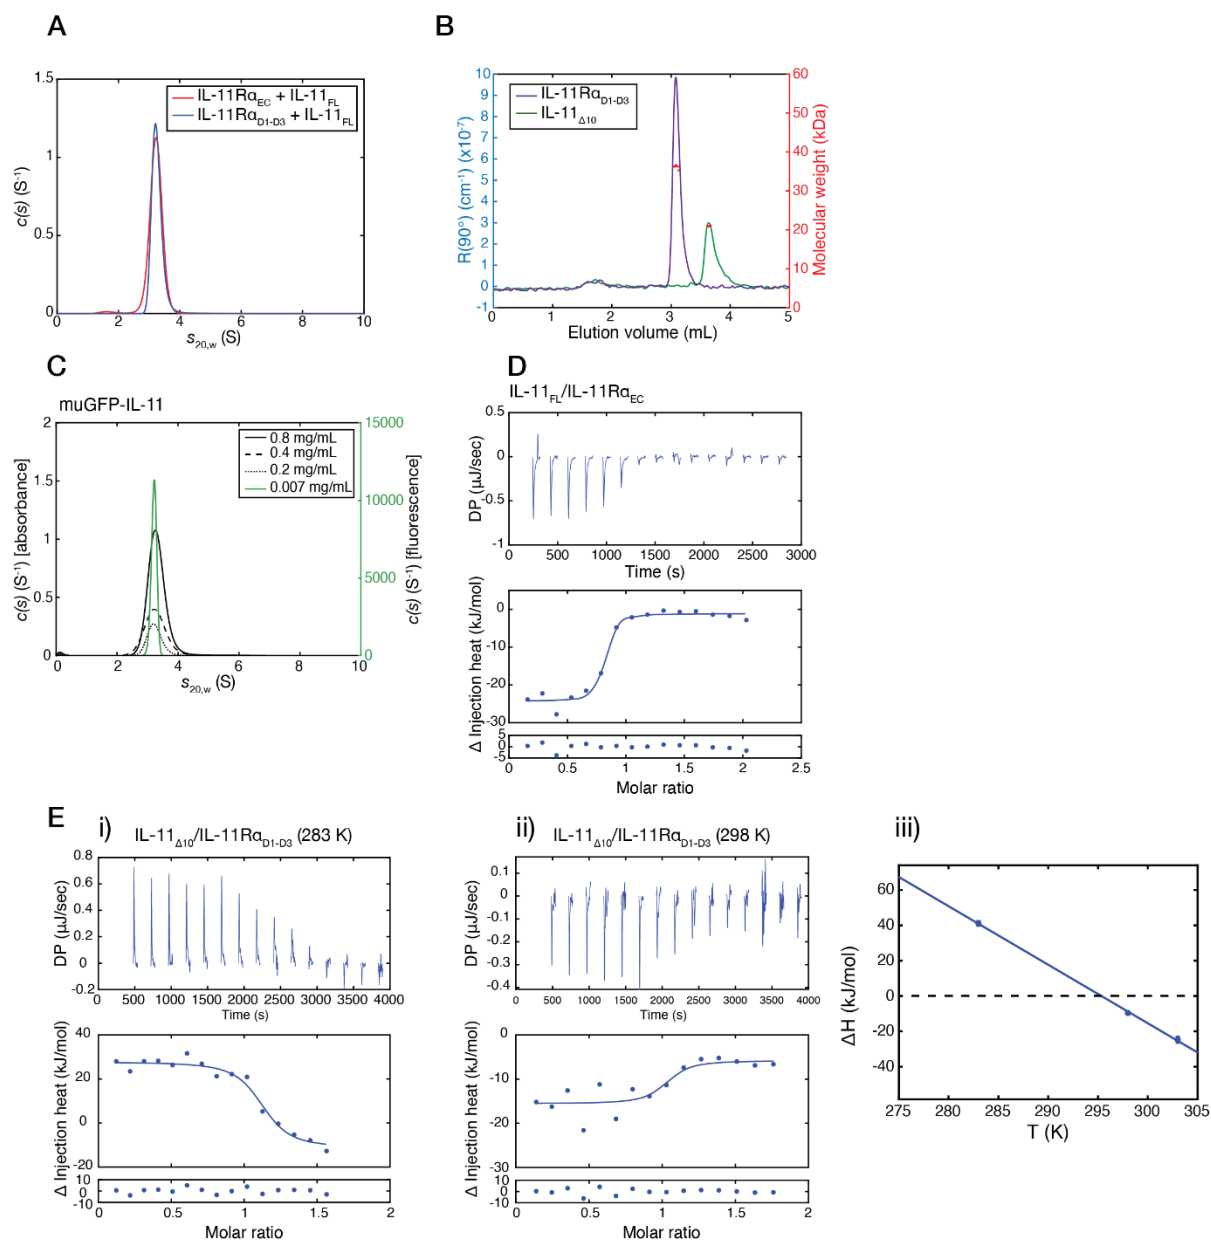

**Figure S6:** Biophysical characterization of muGFP-IL-11 and the IL-11/IL-11R $\alpha$  complex. A)  $c(s)$  distribution for the complexes formed between IL-11 $_{FL}$  and IL-11R $\alpha_{ECD}$ , and IL-11 $_{FL}$  and IL-11R $\alpha_{D1-D3}$ . The complexes were formed by mixing 5  $\mu$ M IL-11 and IL-11R $\alpha$  prior to the experiment, with no further purification. B) SEC-MALS chromatograms (showing light scattering at 90  $^\circ$  against elution volume) and molecular weight traces for IL-11 $_{\Delta 10}$  ( $M_w$  21.0 kDa), and IL-11R $\alpha_{D1-D3}$  ( $M_w$  36.3 kDa). C)  $c(s)$  distributions for muGFP-IL-11 at four concentrations measured using both absorbance (black) and fluorescence (green) detection, showing that it is monomeric in solution. D) Isothermal titration calorimetry isotherm for the interaction between IL-11 $_{FL}$  and IL-11R $\alpha_{EC}$ . The  $K_D$  was  $55 \pm 8$  nM ( $n=3$  titrations, representative titration shown). E) Measurement of  $\Delta C_p$  for the IL-11 $_{\Delta 10}$ /IL-11R $\alpha_{D1-D3}$  interaction. Titrations at two additional temperatures are shown in i), 283 K and ii) 298 K. The heat capacity plot is shown in iii).

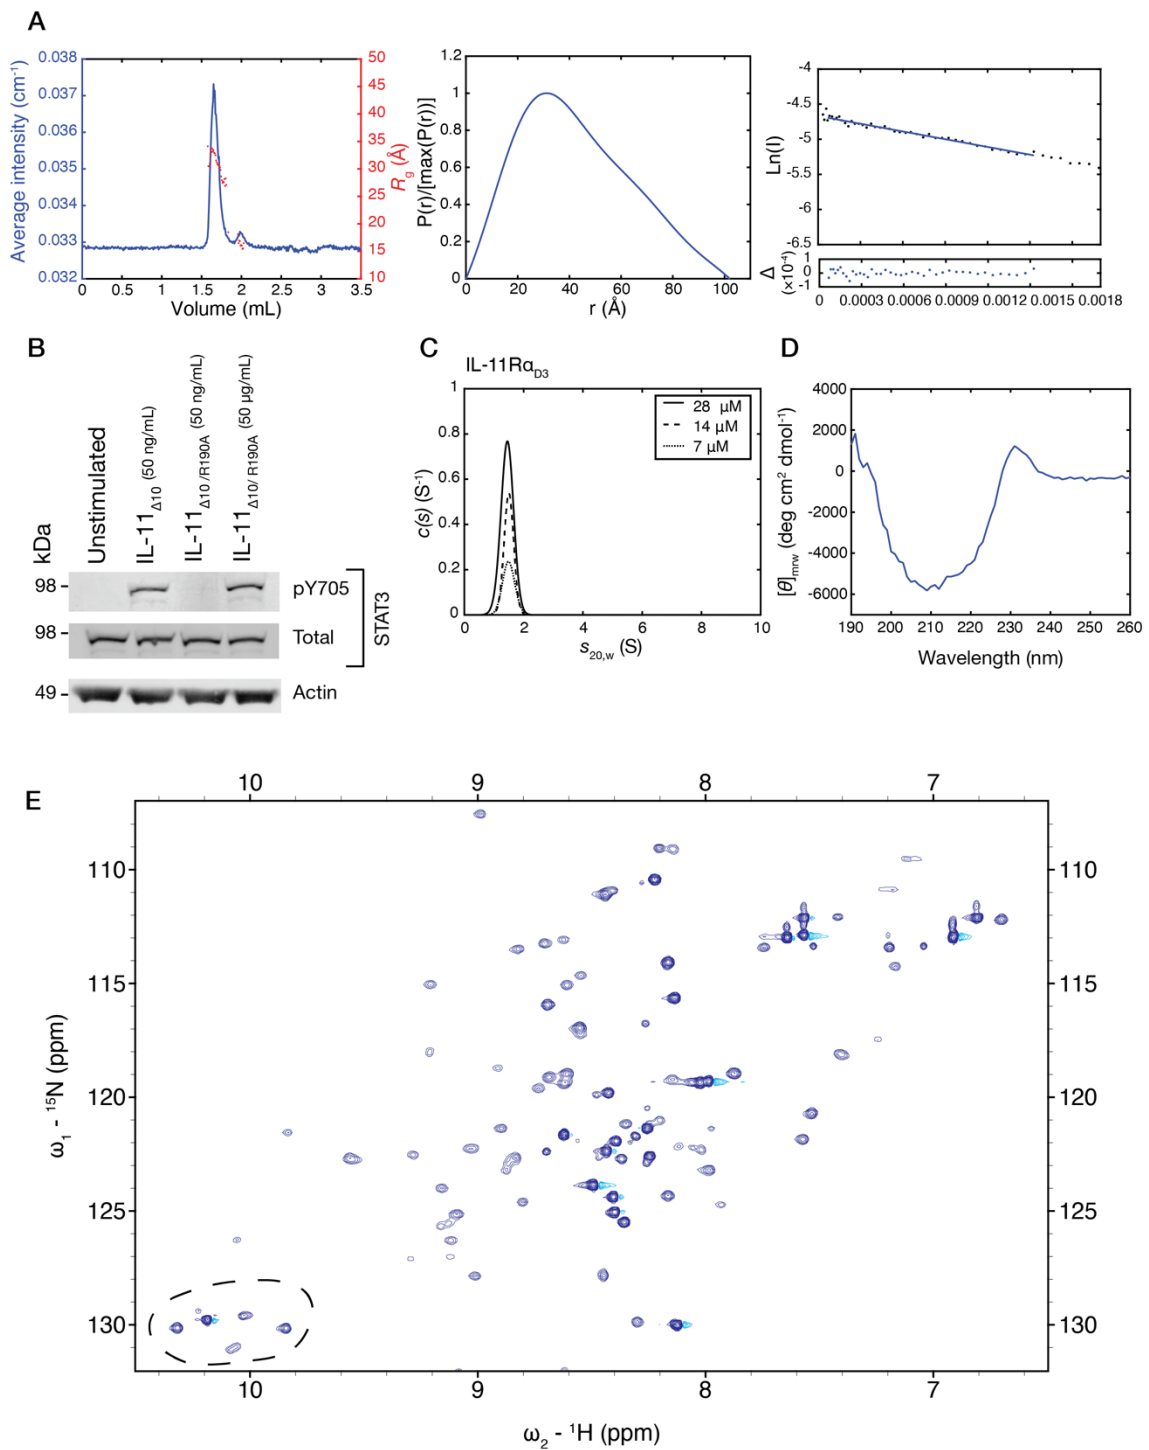

**Figure S7:** A) SEC-SAXS chromatogram, pairwise distance distribution ( $P(r)$ ) plot, and Guinier plot for the IL-11 $_{\Delta 10}$ /IL-11R $_{\alpha D1-D3}$  complex data shown in Figure 5C. B) Western blot, showing activation of STAT3 by both IL-11 $_{\Delta 10}$  and IL-11 $_{\Delta 10/R169A}$  in the colon cancer cell line DLD1. Complete membrane images are shown in Figure S10B. C) CD spectrum for IL-11R $_{\alpha D3}$ , showing a characteristic all- $\beta$  spectrum, showing the protein is well folded. D)  $c(s)$  distributions for IL-11R $_{\alpha D3}$  at three concentrations, showing that it is monomeric in solution. E)  $^{15}\text{N}$ - $^1\text{H}$  HSQC spectrum of purified, refolded IL-11R $_{\alpha D3}$ . The spectrum was collected on 130  $\mu\text{M}$   $^{15}\text{N}$ -IL-11R $_{\alpha D3}$  in 20 mM bis-tris, 50 mM arginine, 10%  $^2\text{H}_2\text{O}$ , pH 7. Of 108 predicted backbone amide peaks, 93 peaks are observed. Tryptophan indole NH resonances are indicated by the dashed outline.

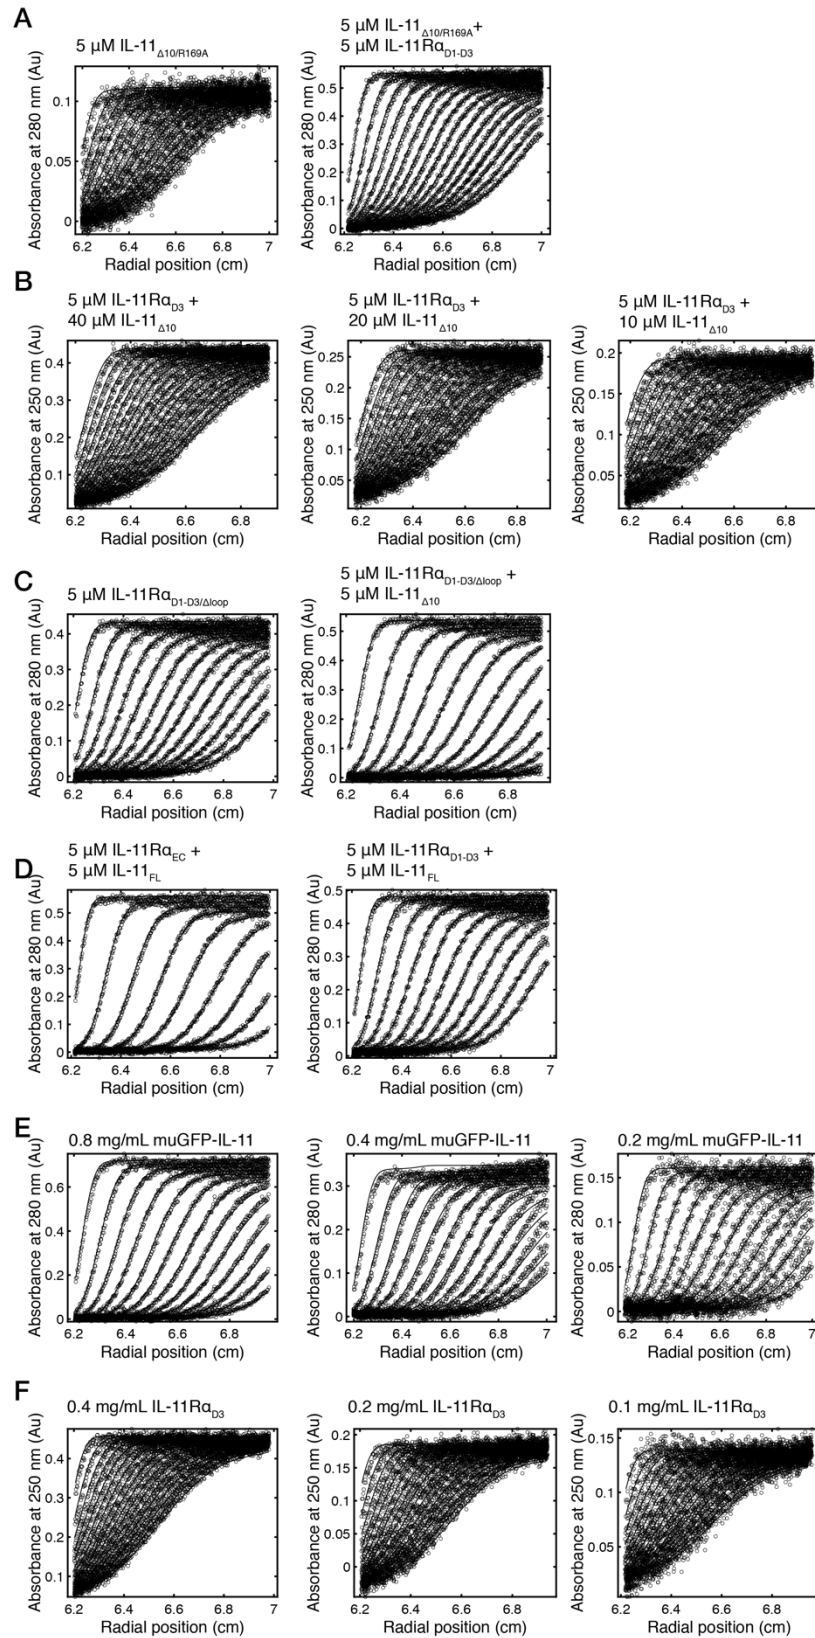

**Figure S8:** Raw AUC data (circles) overlaid with the best fit to a continuous size distribution  $[c(s)]$  model for the distributions shown in, A) Figure 5D ,B) Figure 5E, C) Figure 5F, D) Figure S6A, E) Figure S6B, F) Figure S7D.

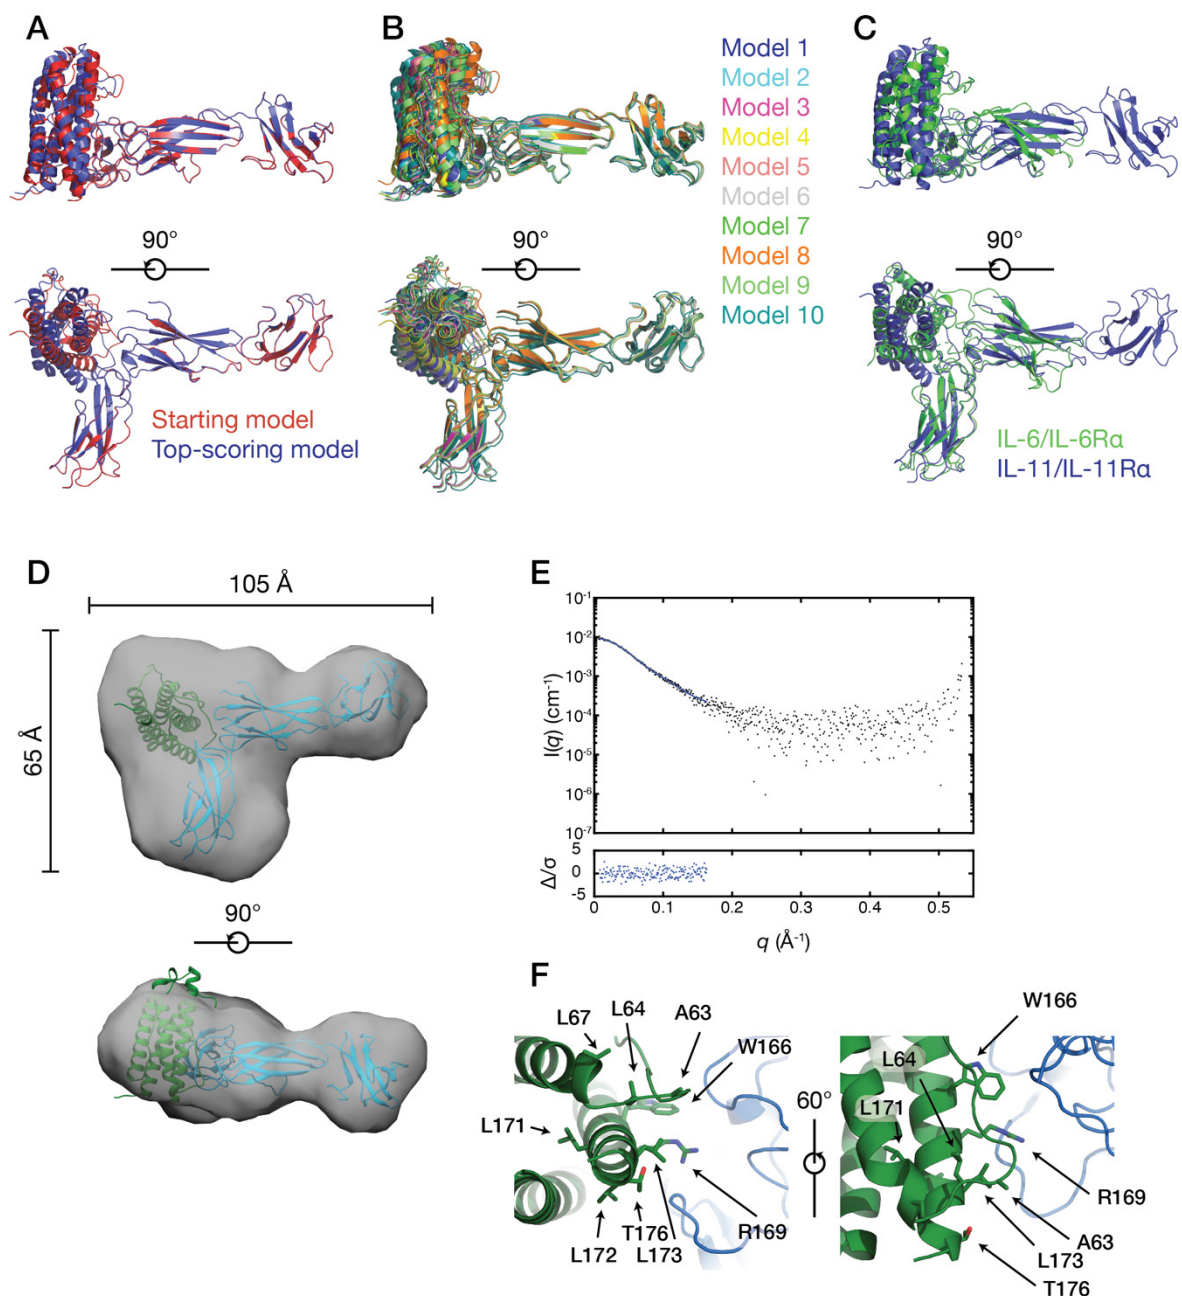

**Figure S9:** A) Overlay of final, top-scoring docked model and initial starting model. B) Overlay of top ten scoring docked models. C) Overlay of top-scoring model with the crystal structure of the IL-6/IL-6R $\alpha$  complex (PDB ID: 1P9M) (5). D) *Ab initio* model of the IL-11R $\alpha_{D1-D3}$ /IL-11 $\Delta_{10}$  complex. (calculated using *DAMMIN*, see Methods), overlaid with the docked model. E) the fit of the *DAMMIN* model to the data ( $\chi^2 = 1.04$ ). F) Position of residues previously studied by mutagenesis (6,7) on the model of the IL-11/IL-11R $\alpha$  complex.



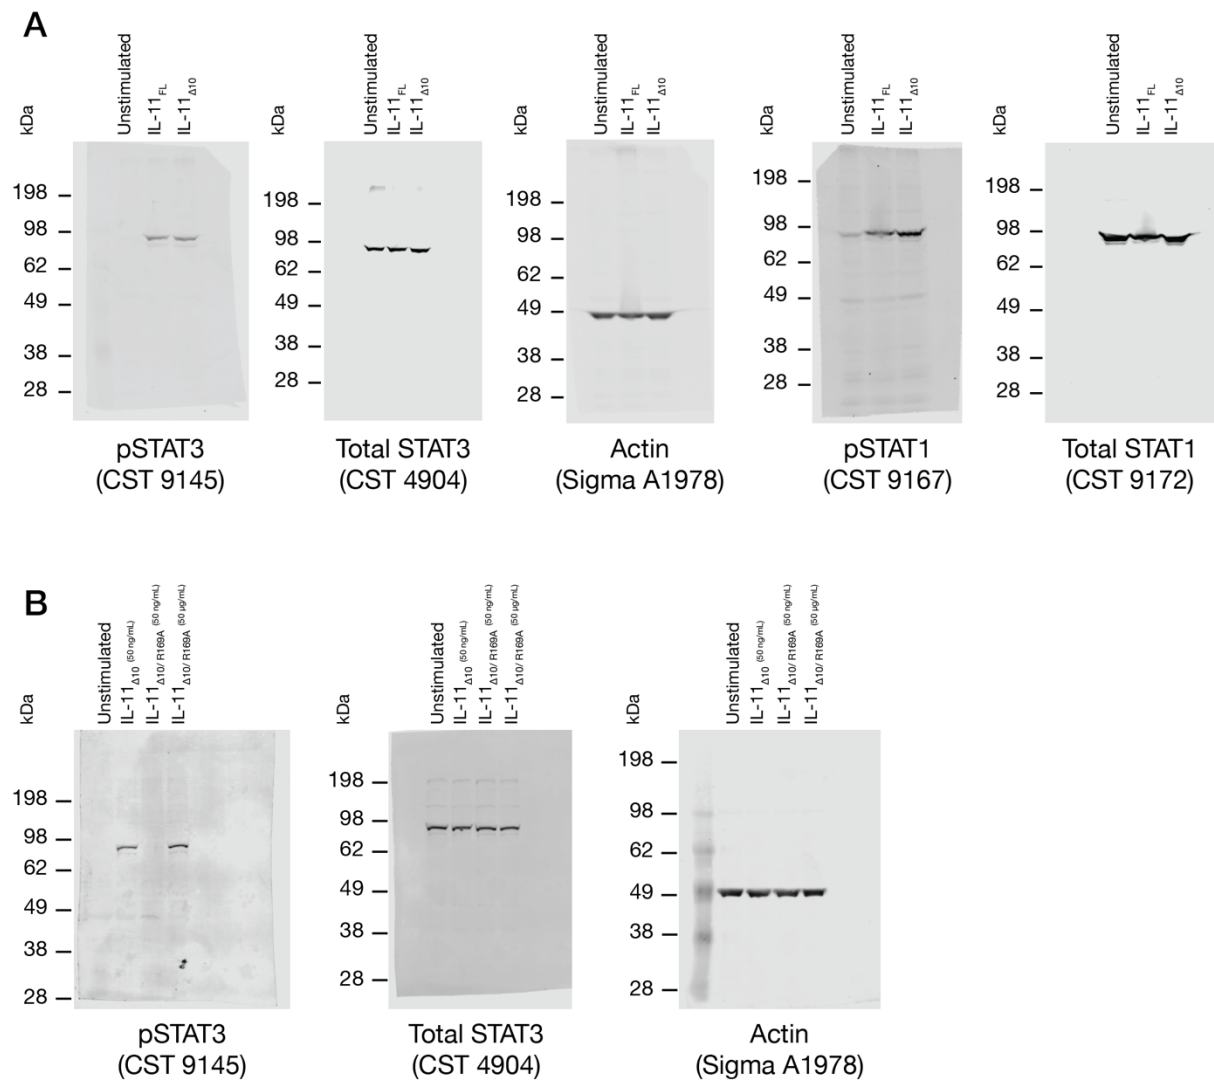

**Figure S10:** Complete membrane images for, A) the blots shown in Figure 3 and B) the blots shown in Figure S7.

**Movie Captions:**

**Movie S1: Animation of MD simulation of WT IL-11R $\alpha$  and the IL-11R $\alpha$  C72F mutant.**

**Movie S2: Animation of MD simulation of WT IL-11R $\alpha$  and the IL-11R $\alpha$  P176T mutant.**

**Movie S3: Animation of MD simulation of WT IL-11R $\alpha$  and the IL-11R $\alpha$  R274W mutant.**

**Movie S4: Animation of MD simulation of WT IL-11R $\alpha$  and the IL-11R $\alpha$  P199R mutant.**

### Supporting Information References:

1. Rambo, R. P., and Tainer, J. A. (2013) Accurate assessment of mass, models and resolution by small-angle scattering. *Nature* **496**, 477-481
2. Tuukkanen, A. T., Kleywegt, G. J., and Svergun, D. I. (2016) Resolution of ab initio shapes determined from small-angle scattering *IUCr* **3**, 440-447
3. Varghese, J., Moritz, R., Lou, M., Van Donkelaar, A., Ji, H., Ivancic, N., Branson, K., Hall, N., and Simpson, R. (2002) Structure of the extracellular domains of the human interleukin-6 receptor  $\alpha$ -chain. *P Natl Acad Sci USA* **99**, 15959-15964
4. Chow, D., He, X., Snow, a. L., Rose-John, S., and Garcia, K. C. (2001) Structure of an extracellular gp130 cytokine receptor signaling complex. *Science* **291**, 2150-2155
5. Boulanger, M. J., Chow, D.-c., Brevnova, E. E., and Garcia, K. C. (2003) Hexameric structure and assembly of the interleukin-6/IL-6 alpha-receptor/gp130 complex. *Science* **300**, 2101-2104
6. Tacke, I., Dahmen, H., Boisteau, O., Minvielle, S., Jacques, Y., Grötzinger, J., Küster, A., Horsten, U., Blanc, C., Montero-Julian, F. a., Heinrich, P. C., and Müller-Newen, G. (1999) Definition of receptor binding sites on human interleukin-11 by molecular modeling-guided mutagenesis. *European Journal of Biochemistry* **265**, 645-655
7. Barton, V., Hudson, K. R., and Heath, J. K. (1999) Identification of three distinct receptor binding sites of murine interleukin-11. *Journal of Biological Chemistry* **274**, 5755-5761
